# Supplementary figures and images for: The Mereology of Depression—Networks of Depressive Symptoms during the Course of Psychotherapy
Source: MDPI journal article supplement (doi:10.3390/ijerph19127131), 2022-06-10

## Supplementary material

**Figure S1.** Histograms of each of the BDI items.

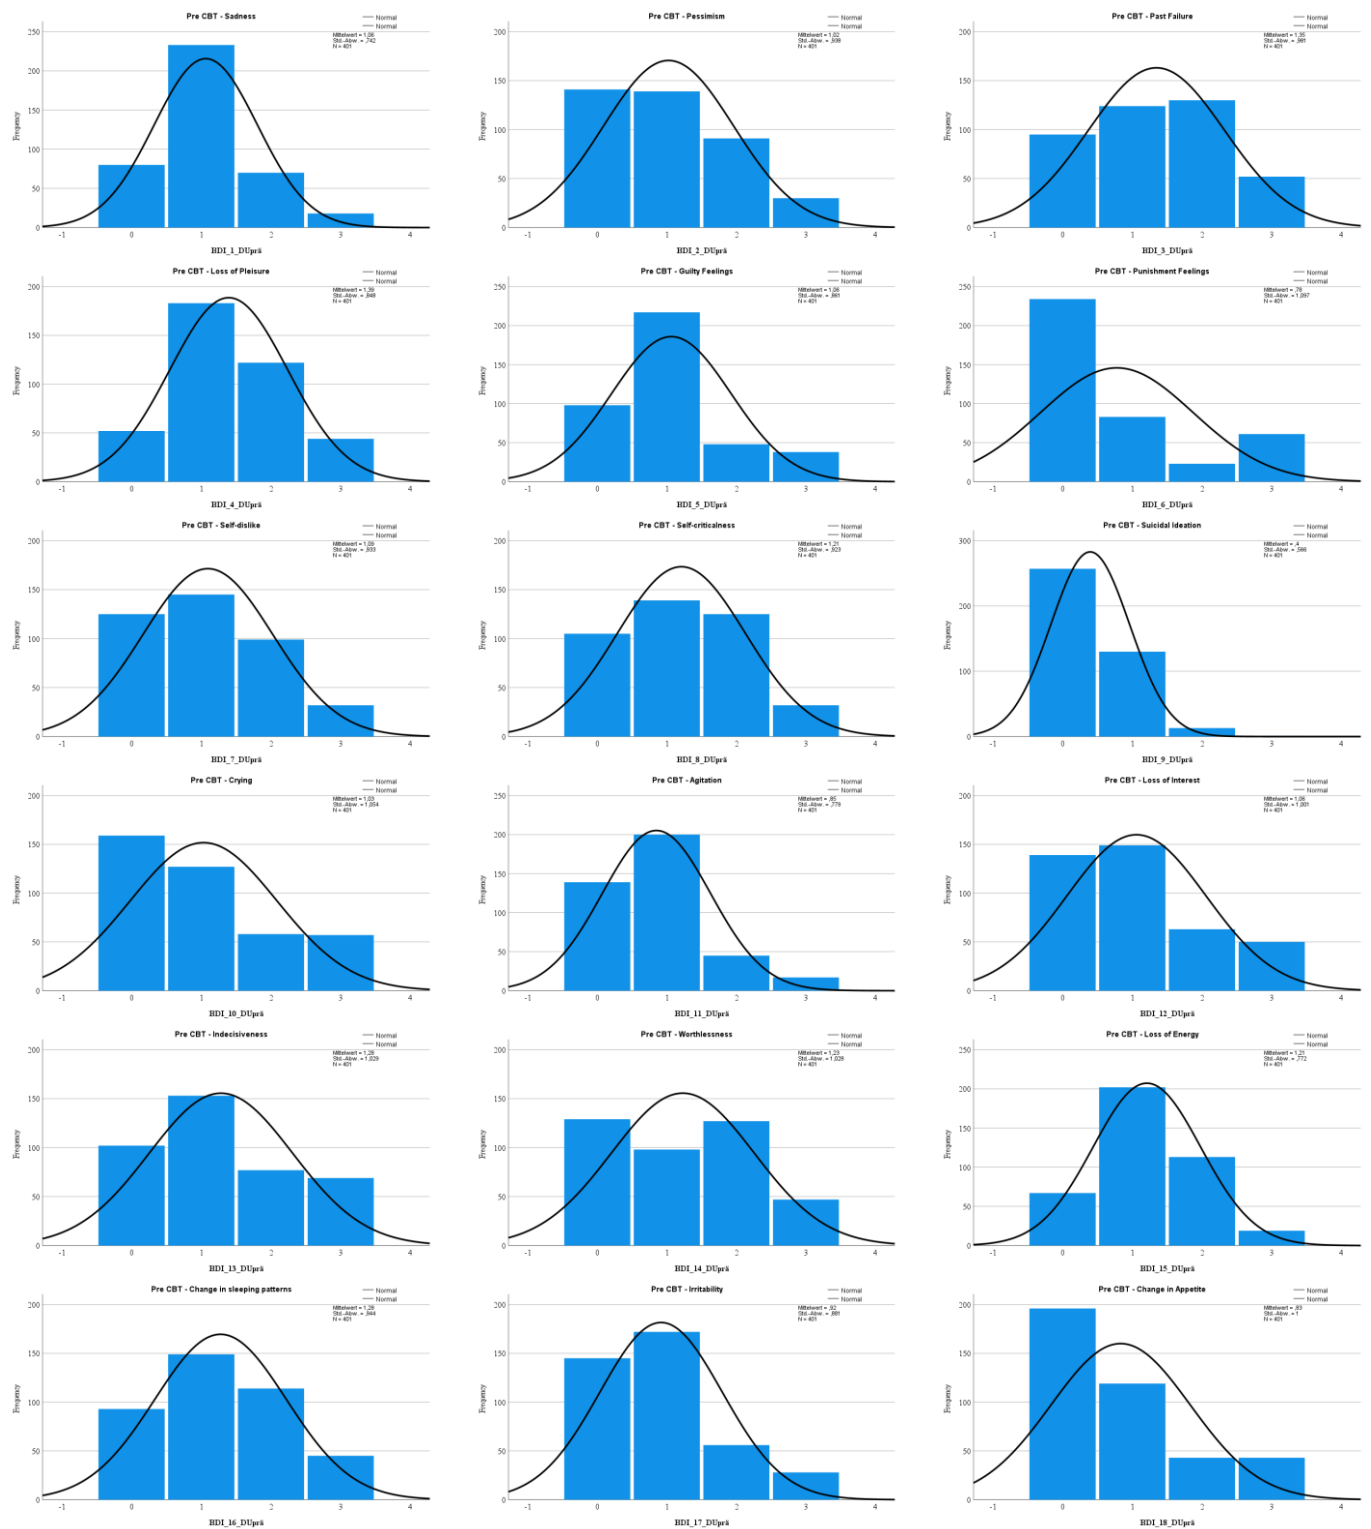

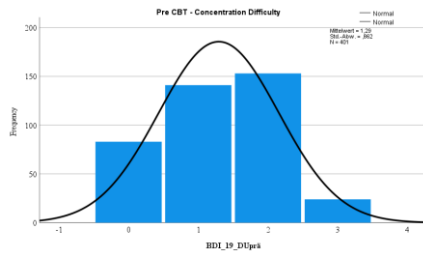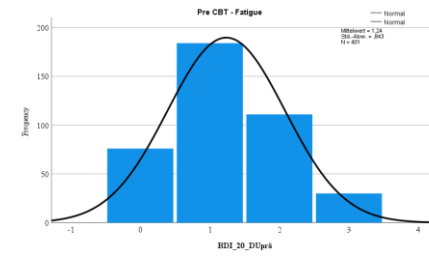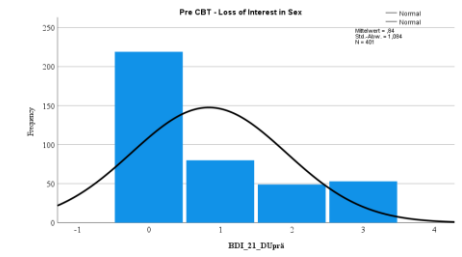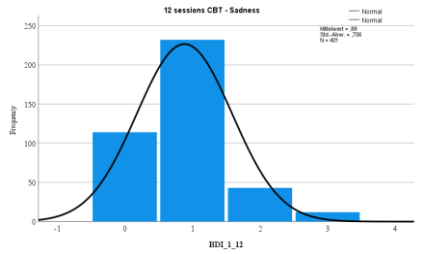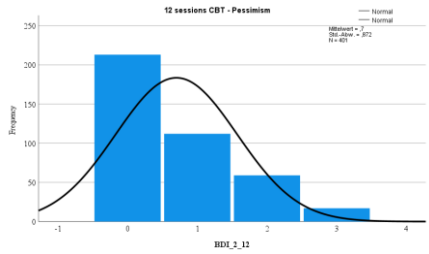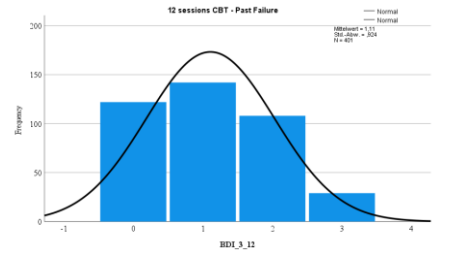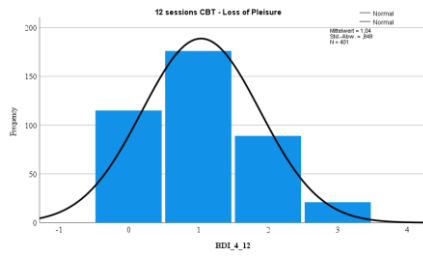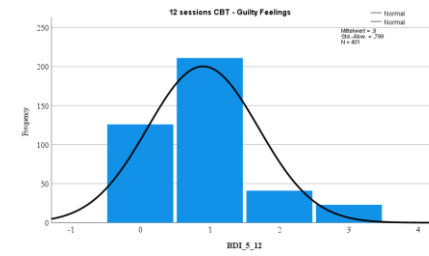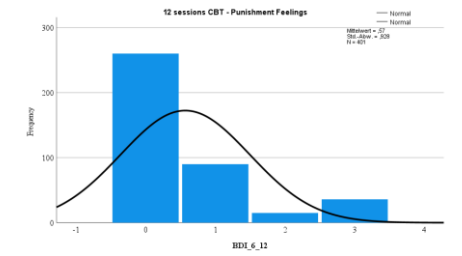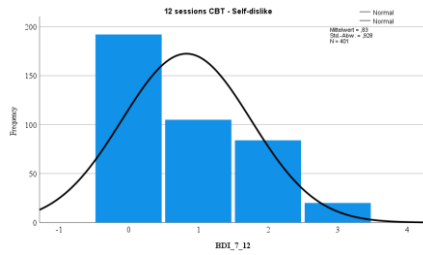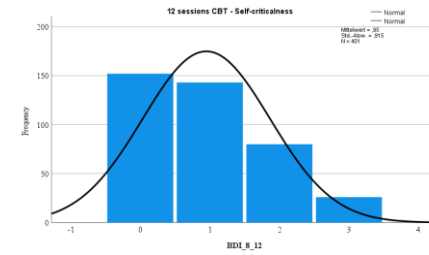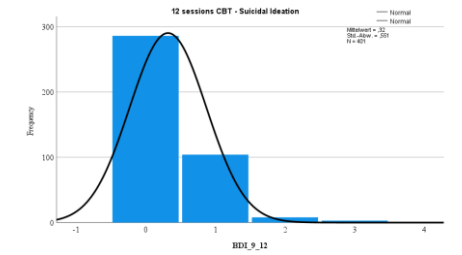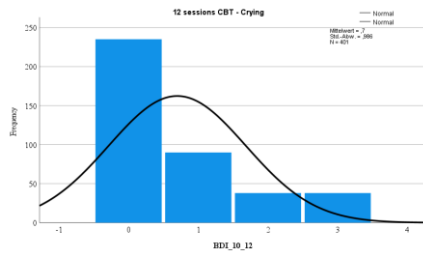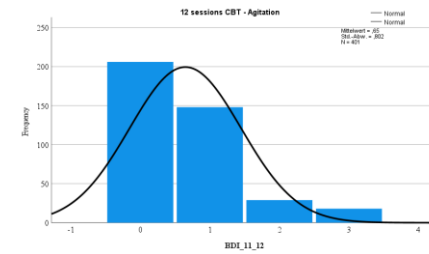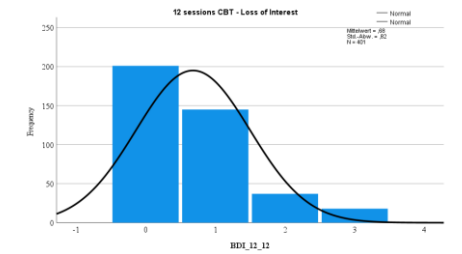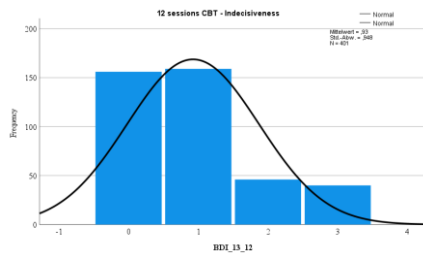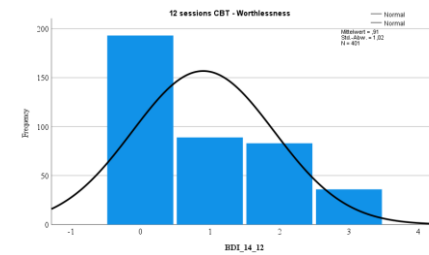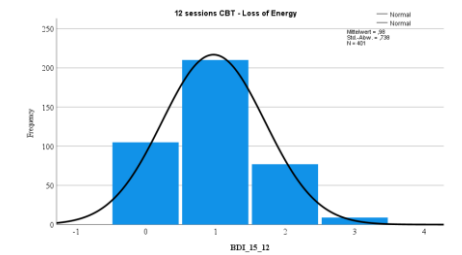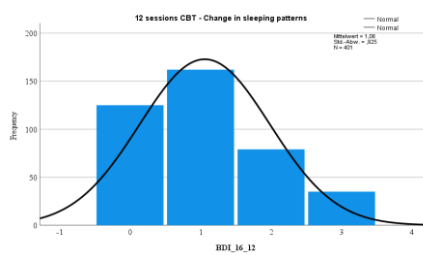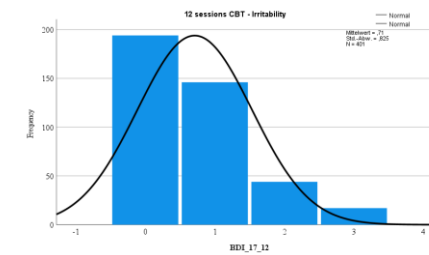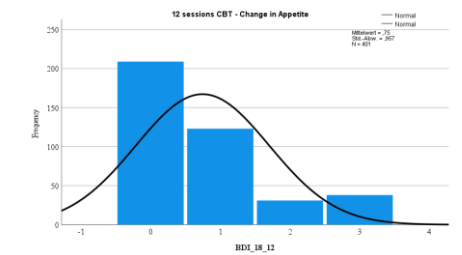

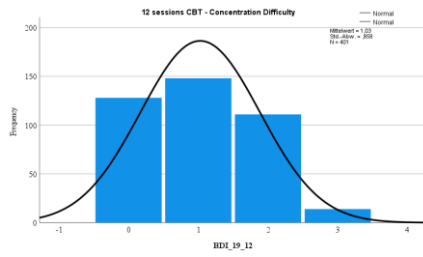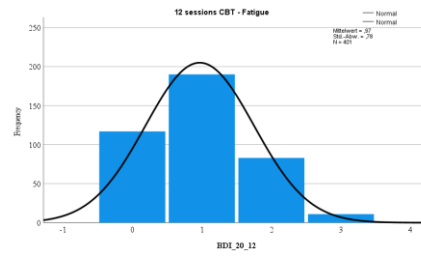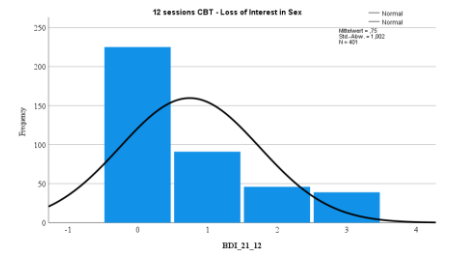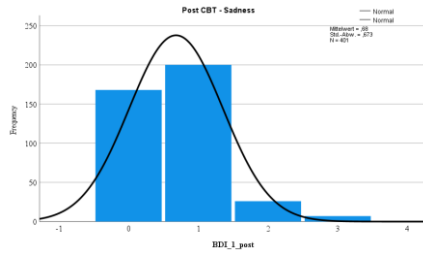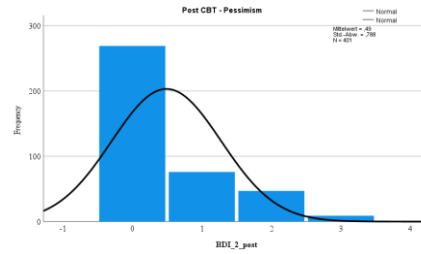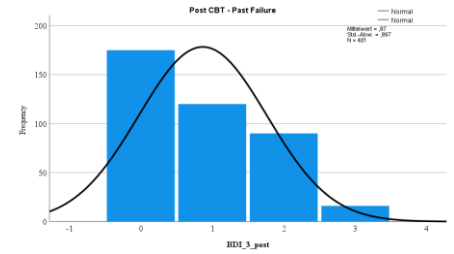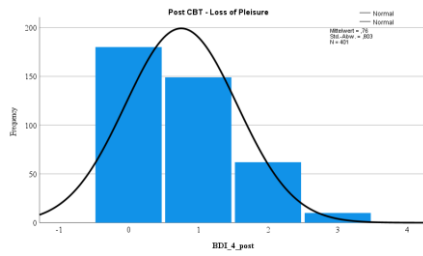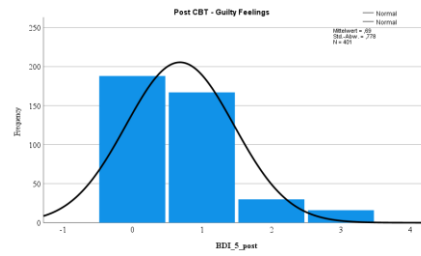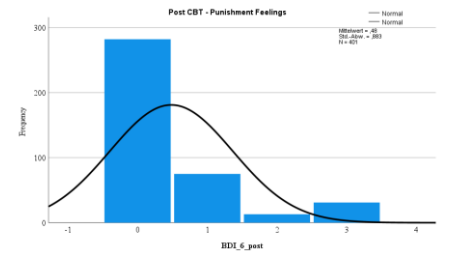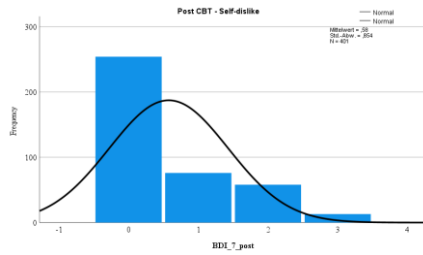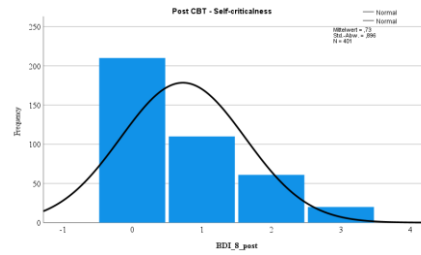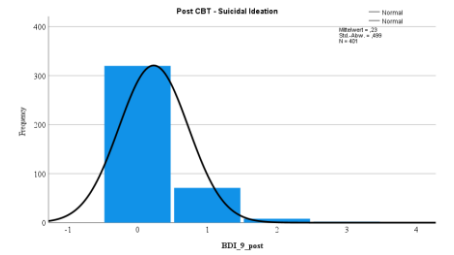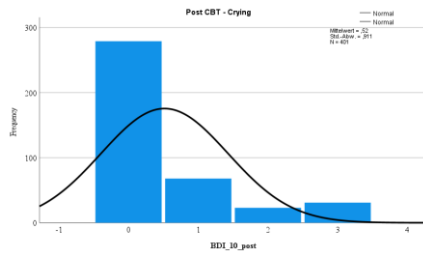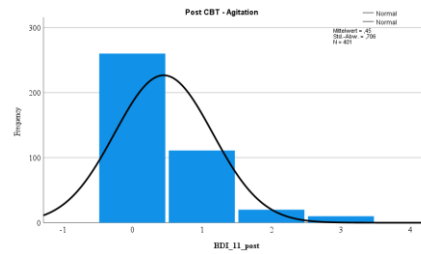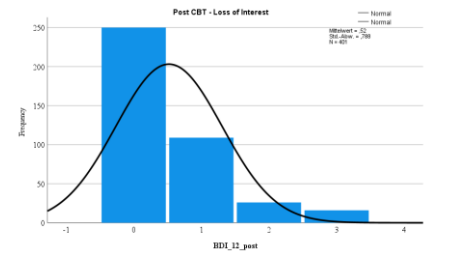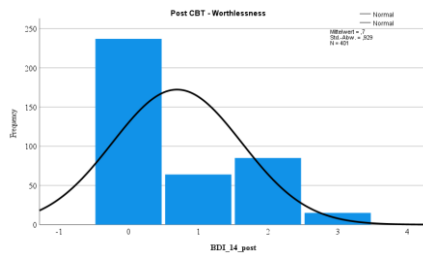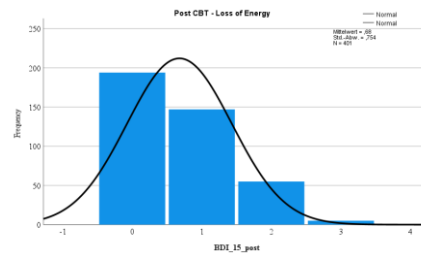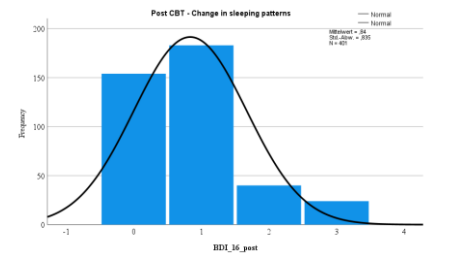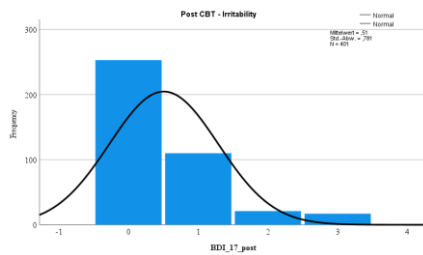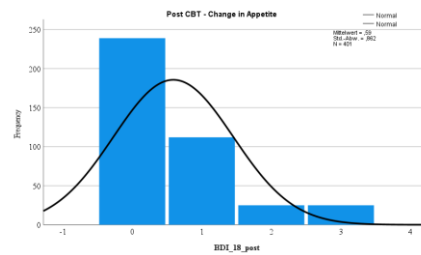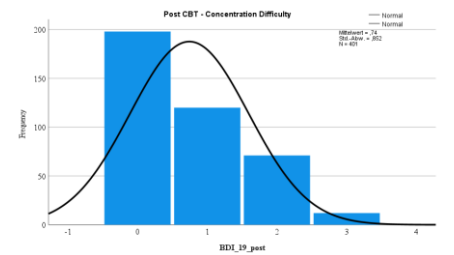

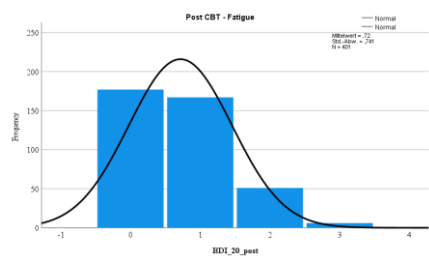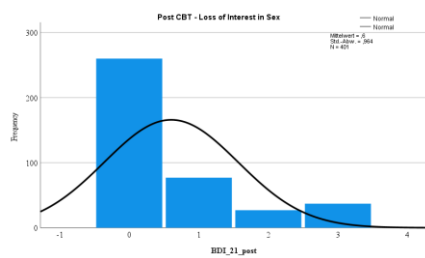

Supplement: s1 [file s1]
